# Supplementary material for: Luminescence property improvement and controllable color regulation of a novel Bi3+ doped Ca2Ta2O7 green phosphor through charge compensation engineering and energy transfer
Source: Royal Society of Chemistry journal article supplement (doi:10.1039/d1cp04635g), 2021-01-01
Supplement: d1cp04635g1.pdf [file d1cp04635g1.pdf]

## **Supplementary Information**

**Luminescence property improvement and controllable color  
regulation of novel Bi<sup>3+</sup> doped Ca<sub>2</sub>Ta<sub>2</sub>O<sub>7</sub> green phosphor through  
charge compensation engineering and energy transfer**

**Mengmeng Jiao<sup>a\*</sup>, Wenzhi Sun<sup>b</sup>, Shufang Zhang<sup>a</sup>, Yanhui Wang<sup>a</sup>, Qinfeng Xu<sup>a</sup>,  
Lichun Zhang<sup>a</sup>, Dehua Wang<sup>a</sup>, Chuanlu Yang<sup>a\*</sup>**

<sup>a</sup> College of Physics and Optoelectronic Engineering, Ludong University, Yantai  
264025, China.

<sup>b</sup> College of Chemistry and Material Science, Ludong University, Yantai 264025,  
China.

**Corresponding Author:**

jmm8996@163.com (M. Jiao)

ycl@ldu.edu.cn (C. Yang)

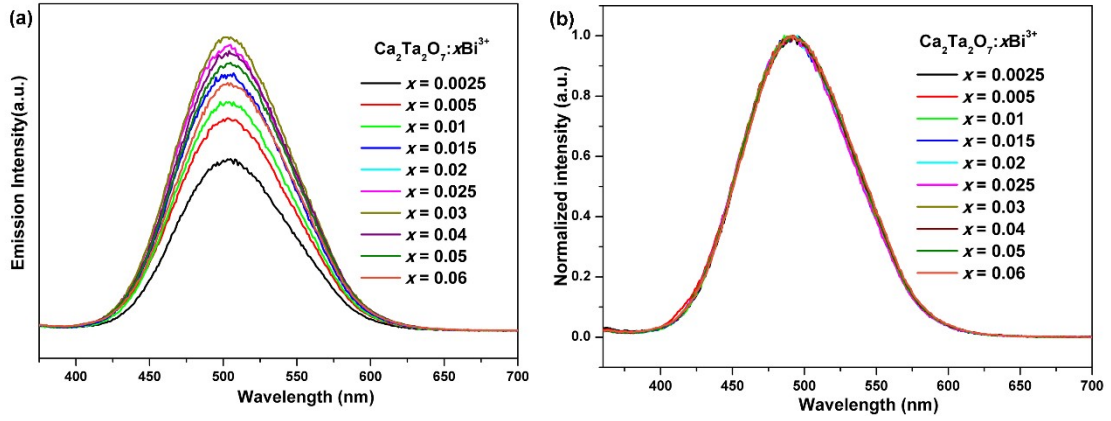

Figure S1. (a) Emission spectra and (b) normalized emission spectra of  $\text{Ca}_2\text{Ta}_2\text{O}_7:x\text{Bi}^{3+}$  ( $x = 0.0025-0.06$ ) phosphors.

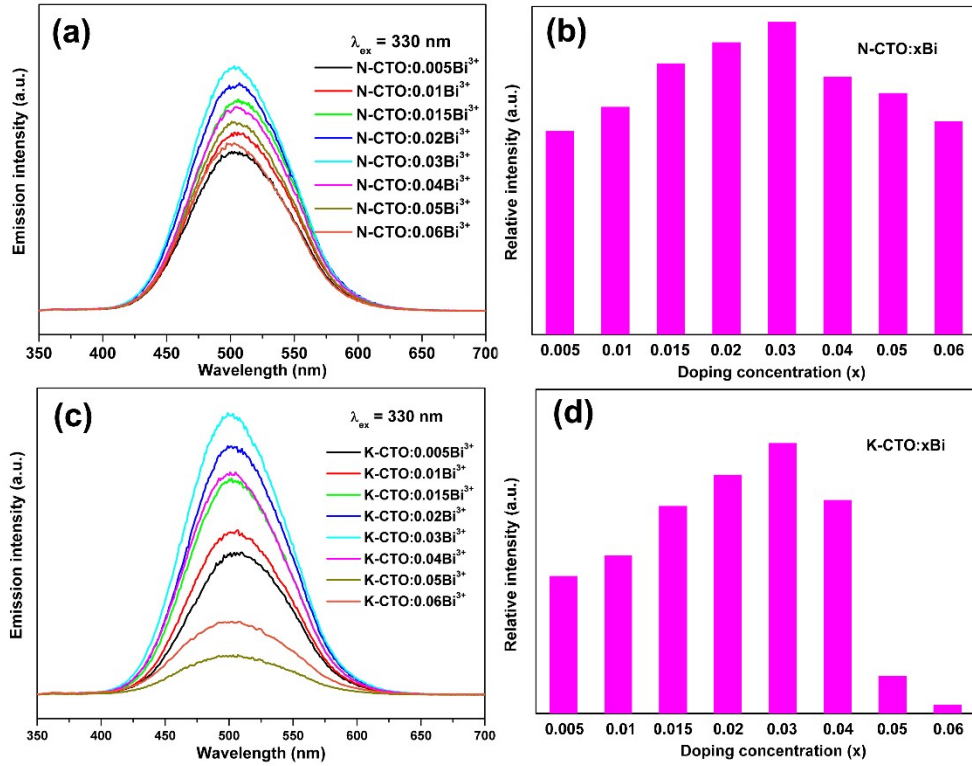

Figure S2. Emission spectra of (a) N-CTO: $x\text{Bi}^{3+}$  and (c) K-CTO: $x\text{Bi}^{3+}$  phosphors. Relative emission intensity of (b) N-CTO: $x\text{Bi}^{3+}$  and (d) K-CTO: $x\text{Bi}^{3+}$  phosphors.

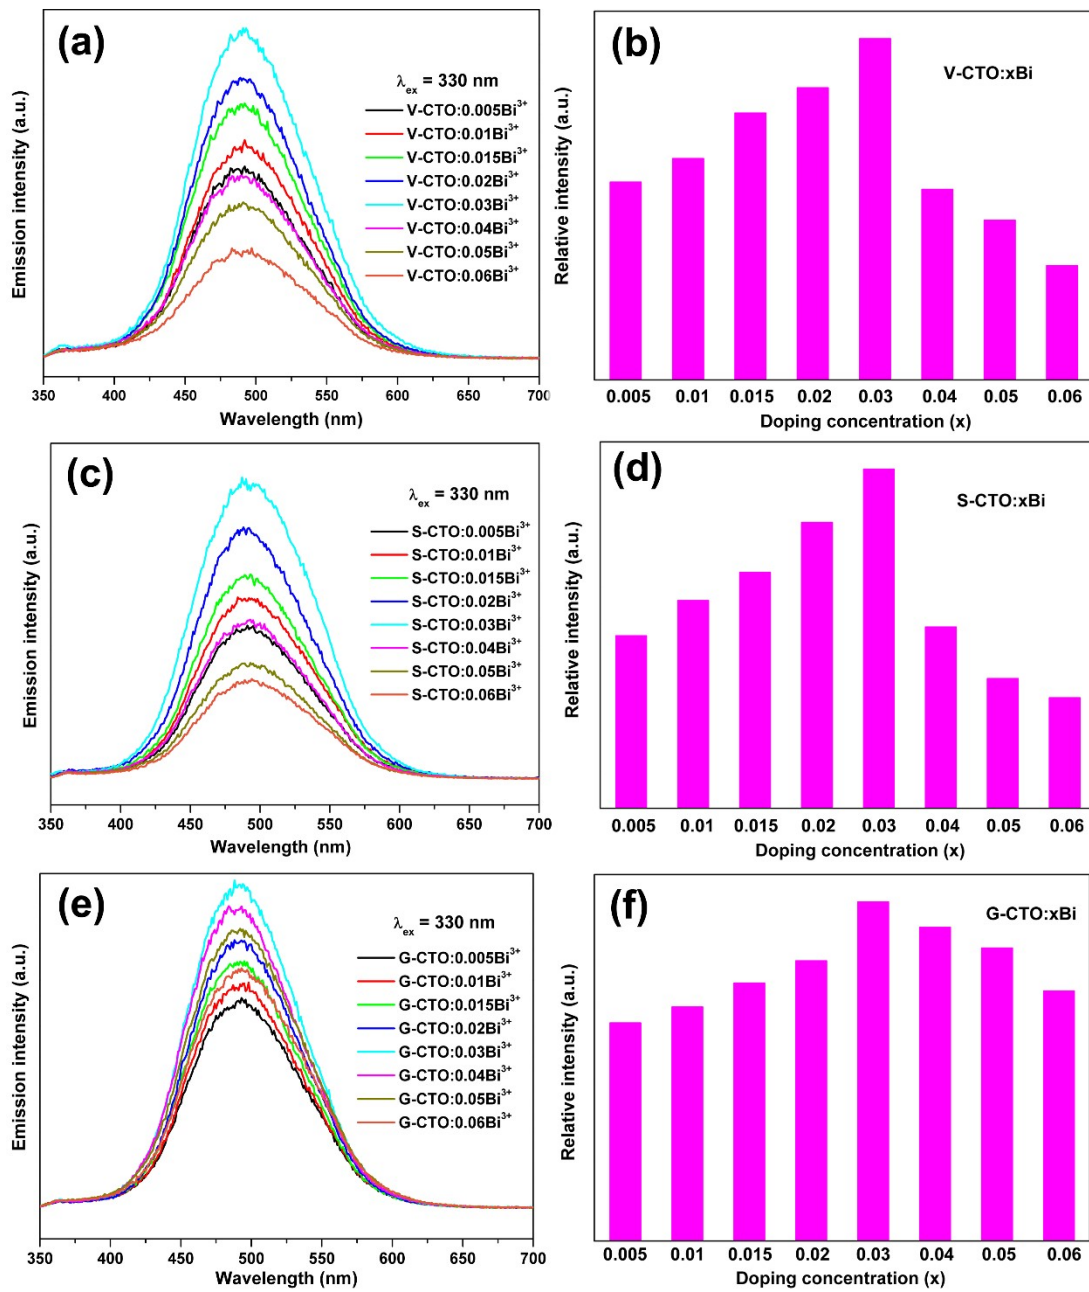

Figure S3. Emission spectra of (a) V-CTO:xBi<sup>3+</sup>, (c) S-CTO:xBi<sup>3+</sup> and (e) G-CTO:xBi<sup>3+</sup> phosphors with different doping content. Relative emission intensity of (b) V-CTO:xBi<sup>3+</sup>, (d) S-CTO:xBi<sup>3+</sup> and (f) G-CTO:xBi<sup>3+</sup> phosphors.

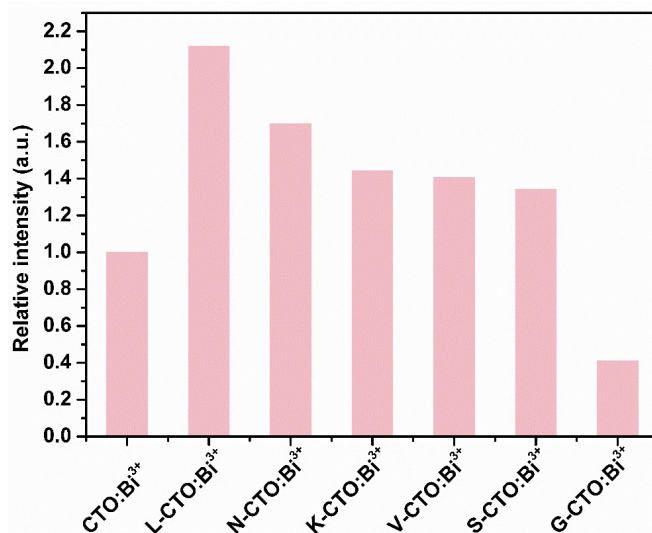

Figure S4. Relative emission intensity of phosphors obtained under different conditions with fixed doping content of Bi<sup>3+</sup>.

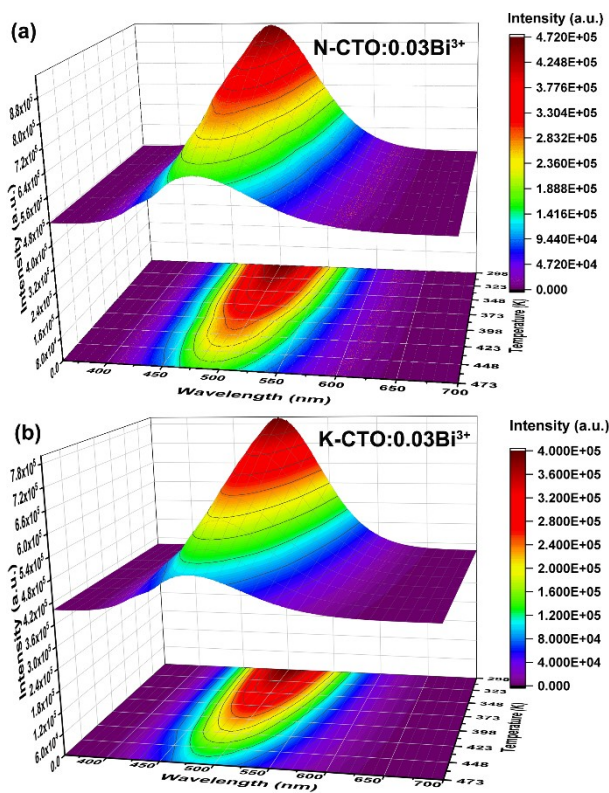

Figure S5. Three dimensional emission spectra of (a) N-CTO:0.03Bi<sup>3+</sup> and (b) K-CTO:0.03Bi<sup>3+</sup> under different temperatures.

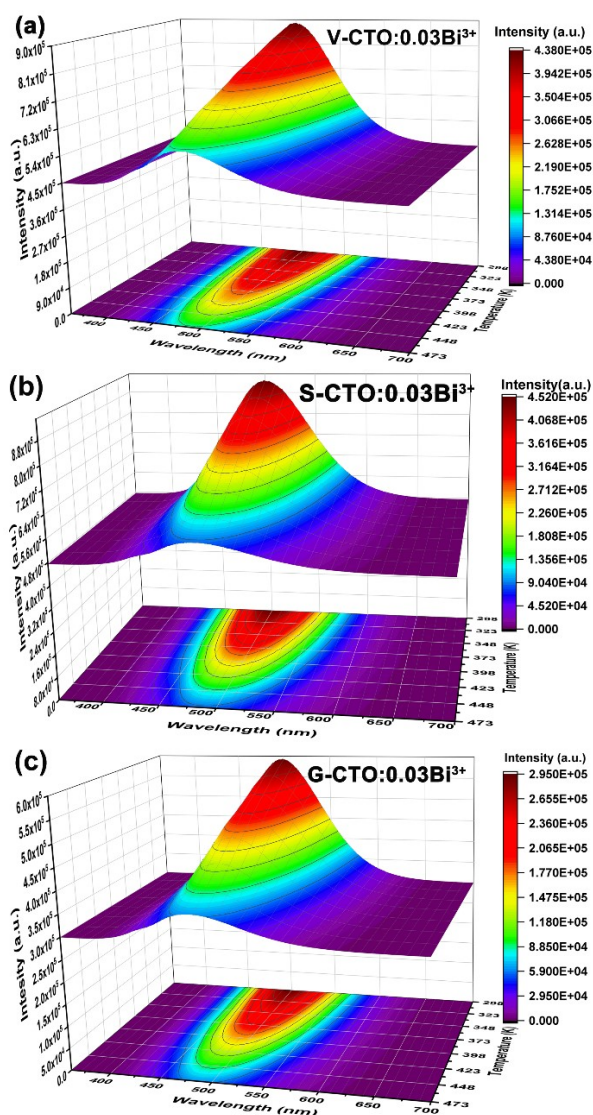

Figure S6. Three dimensional emission spectra of (a) V-CTO:0.03Bi<sup>3+</sup>, (b) S-CTO:0.03Bi<sup>3+</sup>, and (c) G-CTO:0.03Bi<sup>3+</sup> under different temperatures.

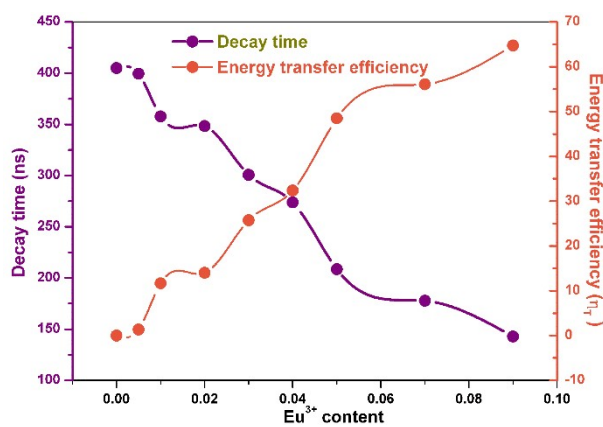

Figure S7. Dependence of decay time of Bi<sup>3+</sup> ions and Bi<sup>3+</sup>→Eu<sup>3+</sup> energy transfer efficiency on Eu<sup>3+</sup> doping content.

Table S1. Final refined structure parameters of Ca<sub>2</sub>Ta<sub>2</sub>O<sub>7</sub> derived from the Rietveld refinement of X-ray diffraction data

| Atom | Wyckof<br>f<br>position | x           | Y          | z          | Frac | Uiso    |
|------|-------------------------|-------------|------------|------------|------|---------|
| Ca1  | 3a                      | 0.85690(0)  | 0.00000    | 0.33333(3) | 1.00 | 0.01    |
| Ca2  | 3b                      | 0.80410(0)  | 0.00000    | 0.83333(3) | 1.00 | 0.01    |
| Ca3  | 6c                      | 0.68007(1)  | 0.18147(1) | 0.00577(6) | 1.00 | 0.01    |
| Ta1  | 3a                      | 0.31697(6)  | 0.00000    | 0.33333(3) | 1.00 | 0.00307 |
| Ta2  | 3b                      | 0.33195(6)  | 0.00000    | 0.83333(3) | 1.00 | 0.00771 |
| Ta3  | 6c                      | 0.49426(6)  | 0.33230(5) | 0.16467(4) | 1.00 | 0.01    |
| O1   | 6c                      | 0.10645(9)  | 0.09766(0) | 0.11015(4) | 1.00 | 0.32505 |
| O2   | 6c                      | 0.56330(0)  | 0.60840(0) | 0.19750(0) | 1.00 | 0.01    |
| O3   | 6c                      | 0.19550(0)  | 0.64040(0) | 0.14640(0) | 1.00 | 0.01    |
| O4   | 6c                      | -0.06488(9) | 0.27688(8) | 0.05883(4) | 1.00 | 0.01    |
| O5   | 6c                      | -0.03357(0) | 0.80878(7) | 0.04830(3) | 1.00 | 0.01    |
| O6   | 6c                      | 0.48712(7)  | 0.37771(8) | 0.04273(7) | 1.00 | 0.01    |
| O7   | 6c                      | 0.45532(1)  | 0.78548(8) | 0.04611(3) | 1.00 | 0.01    |

Cell parameters:  $a = b = 7.3608(2)$  Å,  $c = 18.0955(5)$  Å,  
 $\alpha = \beta = 90^\circ$ ,  $\gamma = 120^\circ$   
 $V = 849.08(3)$  Å<sup>3</sup>;  $Z = 6$ ;  
space group: P3<sub>1</sub>21 (152);  
Reliability factors:  $\chi^2 = 5.897$ ,  $R_{wp} = 12.66\%$ ,  $R_p = 9.63\%$

Table S2. Detailed bond Lengths of Ca-O in Ca<sub>2</sub>Ta<sub>2</sub>O<sub>7</sub> host derived from the structure refinement

| Bond   | Length (Å) | Bond   | Length (Å) | Bond   | Length (Å) |
|--------|------------|--------|------------|--------|------------|
| Ca1-O1 | 2.02       | Ca2-O1 | 2.15       | Ca3-O2 | 2.82       |
| Ca1-O1 | 2.02       | Ca2-O1 | 2.15       | Ca3-O3 | 2.78       |
| Ca1-O4 | 2.44       | Ca2-O2 | 2.84       | Ca3-O4 | 1.90       |
| Ca1-O4 | 2.44       | Ca2-O2 | 2.84       | Ca3-O4 | 2.84       |
| Ca1-O5 | 2.30       | Ca2-O3 | 2.32       | Ca3-O5 | 2.42       |
| Ca1-O5 | 2.30       | Ca2-O3 | 2.32       | Ca3-O6 | 2.57       |
| Ca1-O6 | 2.37       | Ca2-O5 | 2.16       | Ca3-O7 | 2.64       |
| Ca1-O6 | 2.37       | Ca2-O5 | 2.16       | Ca3-O7 | 2.00       |

Average bond length: {Ca1-O}:2.28 Å; {Ca2-O}:2.37 Å; {Ca3-O}:2.50 Å

Table S3. Detailed bond Lengths of Ta-O in Ca<sub>2</sub>Ta<sub>2</sub>O<sub>7</sub> host derived from the structure refinement

| Bond                                                                | Length (Å) | Bond   | Length (Å) | Bond   | Length (Å) |
|---------------------------------------------------------------------|------------|--------|------------|--------|------------|
| Ta1-O5                                                              | 2.01       | Ta2-O1 | 2.45       | Ta3-O1 | 2.68       |
| Ta1-O5                                                              | 2.01       | Ta2-O1 | 2.45       | Ta3-O2 | 1.93       |
| Ta1-O6                                                              | 2.12       | Ta2-O3 | 2.02       | Ta3-O2 | 2.01       |
| Ta1-O6                                                              | 2.12       | Ta2-O3 | 2.02       | Ta3-O3 | 2.04       |
| Ta1-O7                                                              | 2.31       | Ta2-O4 | 2.00       | Ta3-O6 | 2.24       |
| Ta1-O7                                                              | 2.31       | Ta2-O4 | 2.00       | Ta3-O7 | 2.25       |
| Average bond length: {Ta1-O}:2.15 Å; {Ta2-O}:2.16 Å; {Ta3-O}:2.20 Å |            |        |            |        |            |
